# Supplementary material for: Sodium bismuth dichalcogenides: candidates for ferroelectric high-mobility semiconductors for multifunctional applications
Source: Royal Society of Chemistry journal article supplement (doi:10.1039/c9cp00336c), 2019-01-01
Supplement: c9cp00336c1.pdf [file c9cp00336c1.pdf]

### Supplementary Information

Sodium Bismuth Dichalcogenides: Candidates of Ferroelectric High-mobility Semiconductors for Multifunctional Applications

Tingting Zhong,<sup>1</sup> Minghu Pan,<sup>1</sup> Guoying Gao,<sup>1</sup> Huahua Fu,<sup>1</sup> Menghao Wu,<sup>1\*</sup> Jun-Ming Liu<sup>2</sup>

<sup>1</sup>School of Physics, Huazhong University of Science and Technology, Wuhan, Hubei 430074, China

<sup>2</sup>Laboratory of Solid State Microstructures, Nanjing University, Nanjing 210093, China

Table S1. Fitted parameters A, B, C in Landau-Ginzburg expansion.

|                     | A     | B      | C       |
|---------------------|-------|--------|---------|
| NaBiS <sub>2</sub>  | -5.97 | -29.27 | 771.26  |
| NaBiSe <sub>2</sub> | -5.26 | -98.23 | 1223.03 |

Table S2. Calculated effective mass  $m^*$  (with  $m_0$  being the static electron mass), deformation potential  $E_i$ , elastic modulus C and carrier mobility  $u$  along the x and y directions.

|                                                       | $m_x^*/m_0$ | $m_y^*/m_0$ | $E_{ix}$<br>(eV) | $E_{iy}$ | $C_{x,3D}$<br>(J · m <sup>-3</sup> ) | $C_{y,3D}$            | $u_{x,3D}$<br>(10 <sup>3</sup> cm <sup>2</sup> · V <sup>-1</sup> · s <sup>-1</sup> ) | $u_{y,3D}$ |
|-------------------------------------------------------|-------------|-------------|------------------|----------|--------------------------------------|-----------------------|--------------------------------------------------------------------------------------|------------|
| 3% biaxial strain NaBiS <sub>2</sub>                  | 0.21        | 0.38        | -7.47            | -4.52    | $0.56 \times 10^{11}$                | $0.50 \times 10^{11}$ | 3.04                                                                                 | 1.68       |
| Na <sub>0.5</sub> K <sub>0.5</sub> BiS <sub>2</sub>   | 0.37        | 0.42        | -6.37            | -3.93    | $0.38 \times 10^{11}$                | $0.33 \times 10^{11}$ | 0.69                                                                                 | 1.14       |
| NaBi <sub>0.75</sub> V <sub>0.25</sub> S <sub>2</sub> | 0.26        | 0.43        | -4.61            | -6.11    | $0.44 \times 10^{11}$                | $0.36 \times 10^{11}$ | 3.68                                                                                 | 0.49       |

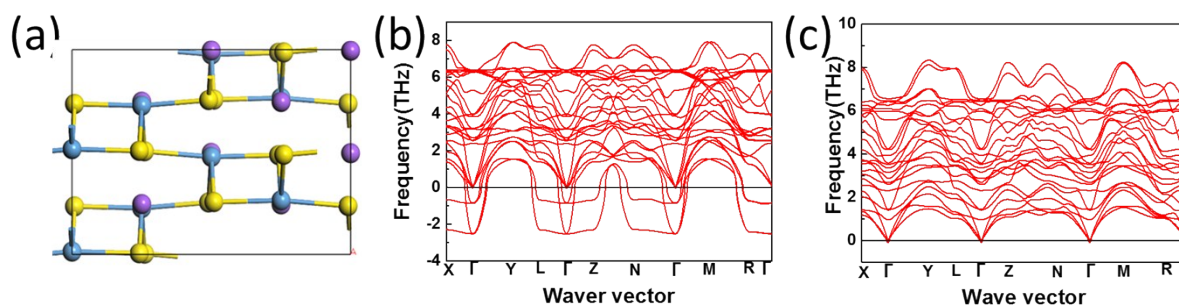

Figure S1. (a)Antiferroelectric configuration of NaBiS<sub>2</sub>. Phonon dispersion of (b)paraeelectric and (c)FE phase for NaBiS<sub>2</sub> calculated by using Phonopy.

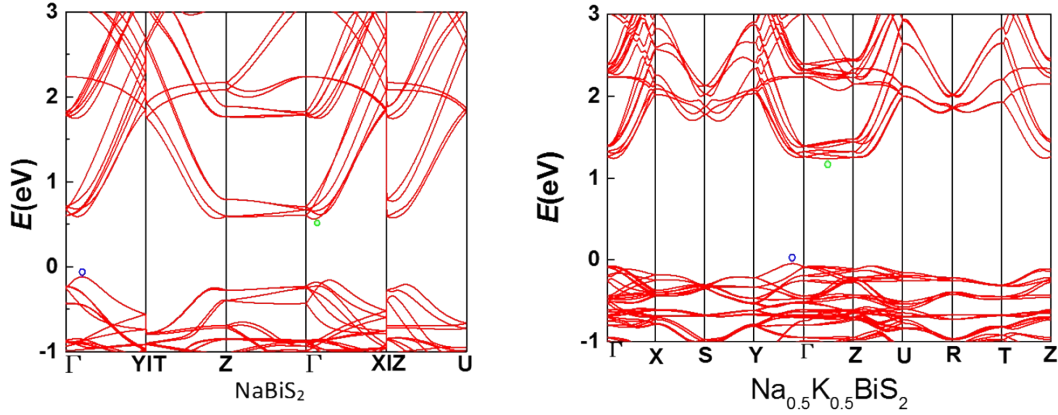

Figure S2. Bandstructures of NaBiS<sub>2</sub> and Na<sub>0.5</sub>K<sub>0.5</sub>BiS<sub>2</sub> by using PBE+SOC.

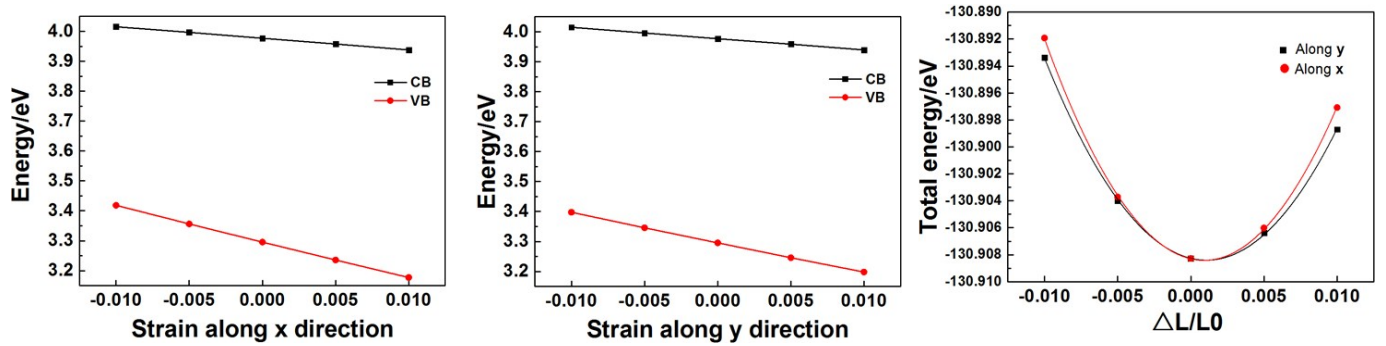

Figure S3.  $E_1$  obtained by linearly fitting the energy shift of the band energy position (CBM and VBM) with respect to a small lattice strain along the  $-x$  (left) and  $-y$  (middle) direction, and  $C_{111}$  calculated based on the quadratic relation between the total energy and lattice dilations under strain (right).

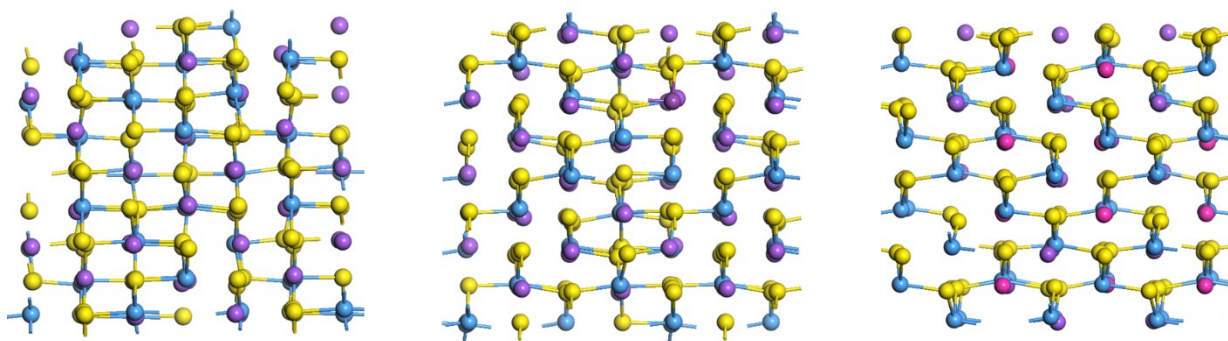

Figure S4. Snapshot of the equilibrium structures at 300K for pristine NaBiS<sub>2</sub> (left), NaBiS<sub>2</sub> upon a 3% biaxial strain at xy plane (middle), and Na<sub>0.5</sub>K<sub>0.5</sub>BiS<sub>2</sub> (right) at the end of 10ps of ab initio MD simulation with a canonical ensemble (time step is set as 1fs).
